# Supplementary material
Source: PubMed Central journal article supplement (PMC4405167)
Supplement: NIHMS641453-supplement-9.pdf [file NIHMS641453-supplement-9.pdf]

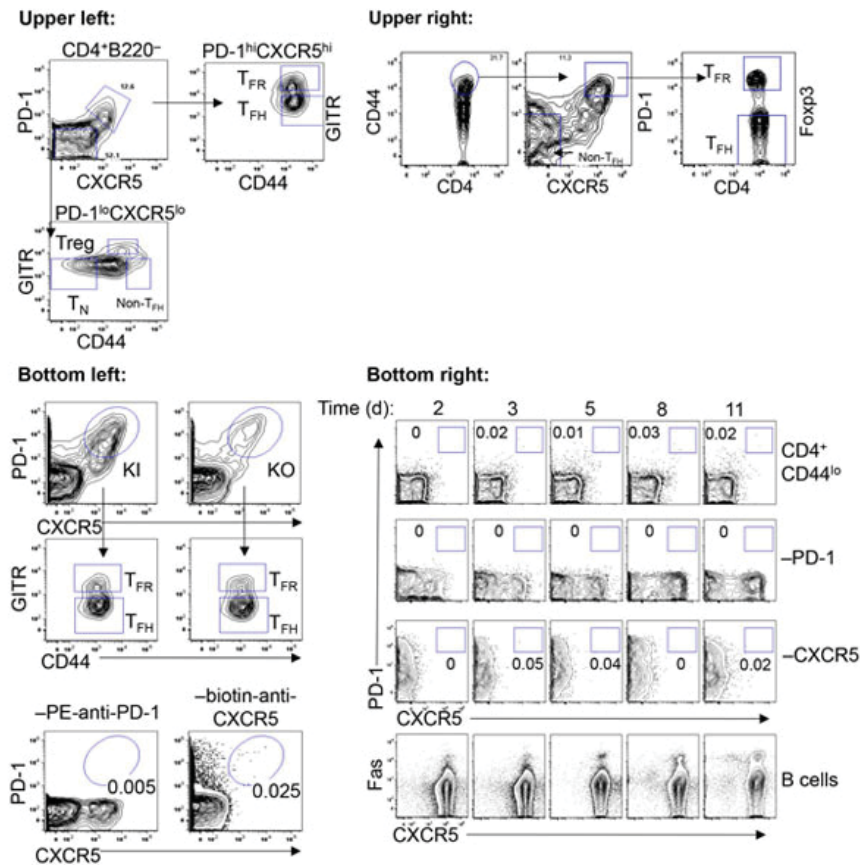

Supplementary Figure 1

### Sorting and gating strategy.

*Upper left*, FACS plots show isolation of different CD4<sup>+</sup> T<sub>H</sub> populations from B6 or OPN-i-KI mice after immunization with KLH in CFA. T<sub>N</sub>: CD4<sup>+</sup>CD44<sup>lo</sup>CXCR5<sup>lo</sup>PD-1<sup>lo</sup>GITR<sup>-</sup> naïve cells; T<sub>FH</sub>: CD4<sup>+</sup>CD44<sup>hi</sup>CXCR5<sup>+</sup>PD-1<sup>+</sup>GITR<sup>-</sup> cells; T<sub>FR</sub>: CD4<sup>+</sup>CD44<sup>hi</sup>CXCR5<sup>+</sup>PD-1<sup>+</sup>GITR<sup>+</sup> cells; Non-T<sub>FH</sub>: CD4<sup>+</sup>CD44<sup>hi</sup>CXCR5<sup>lo</sup>PD-1<sup>lo</sup>GITR<sup>-</sup> cells; T<sub>reg</sub>: CD4<sup>+</sup>CD44<sup>med</sup>CXCR5<sup>-</sup>PD-1<sup>-</sup>GITR<sup>+</sup> cells. *Bottom left*, FACS plots show isolation of CD4<sup>+</sup> T<sub>FH</sub> or T<sub>FR</sub> cells from OPN-i-KI or OPN-KO mice 5 d after immunization with KLH in CFA, shown in Fig. 2e. Gating control stains that lack (-) either anti-PD-1 or biotin-anti-CXCR5 using OPN-i-KI cells are shown. *Upper right*, gating strategy for T<sub>FH</sub> (CD4<sup>+</sup>CD44<sup>hi</sup>CXCR5<sup>+</sup>PD-1<sup>+</sup>Foxp3<sup>-</sup>), T<sub>FR</sub> (CD4<sup>+</sup>CD44<sup>hi</sup>CXCR5<sup>+</sup>PD-1<sup>+</sup>Foxp3<sup>+</sup>) and non-T<sub>FH</sub> (CD4<sup>+</sup>CD44<sup>hi</sup>CXCR5<sup>lo</sup>PD-1<sup>lo</sup>) cells in Fig. 3a. *Bottom right*, Gating controls for defining the PD-1<sup>+</sup>CXCR5<sup>+</sup> surface phenotype of CD4<sup>+</sup> T<sub>FH</sub> and T<sub>FR</sub> cells in Fig. 3c. Negative control: CD4<sup>+</sup>CD44<sup>lo</sup> cells; Positive control (for CXCR5 stains): Fas<sup>+</sup>B220<sup>+</sup> B cells; FMO PD-1 control: all antibodies except (-) anti-PD-1; CXCR5 control: all antibodies except (-) biotin-anti-CXCR5 (streptavidin-APC alone).

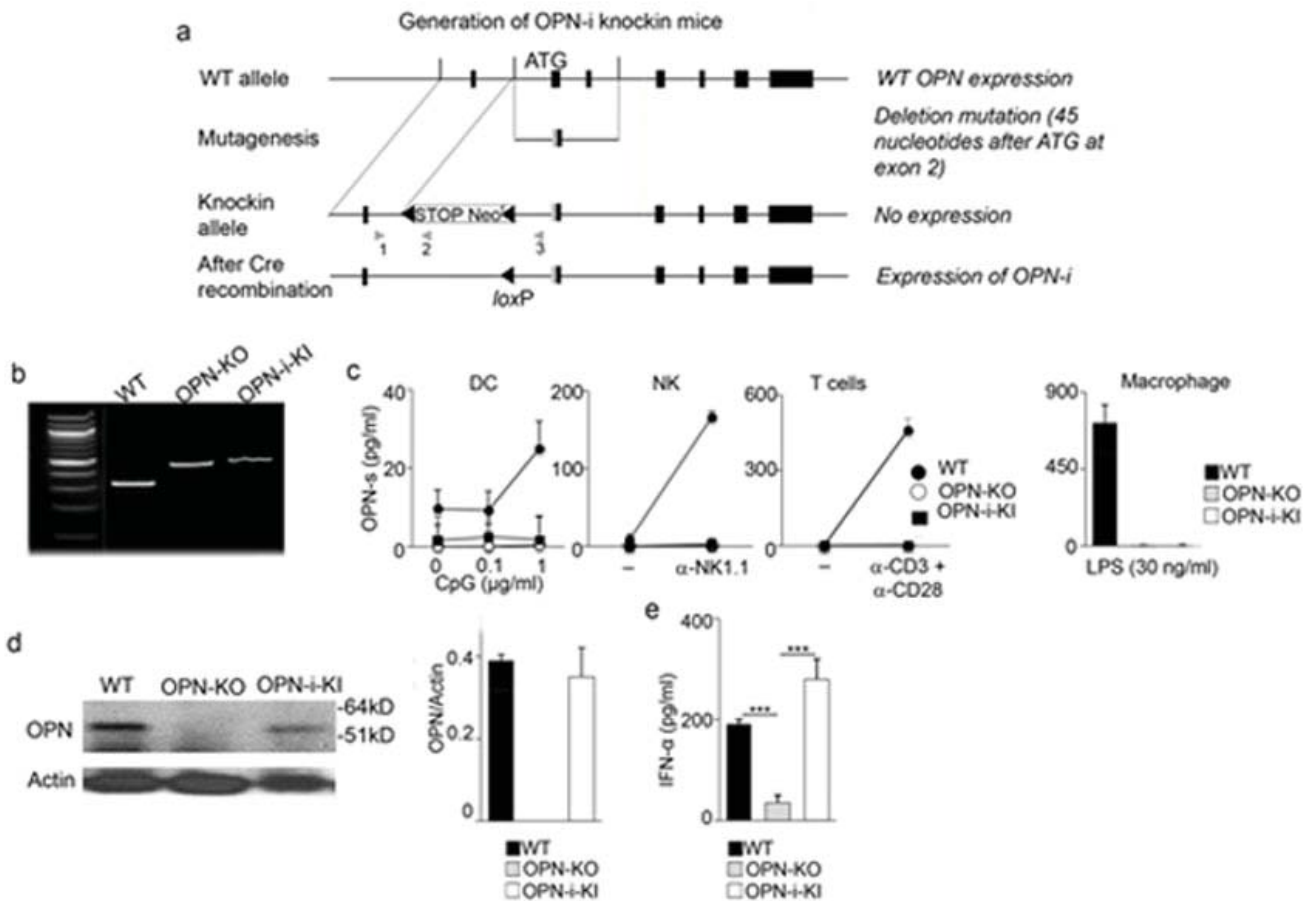

Supplementary Figure 2

### Generation and confirmation of OPN-i-KI mice.

**a**, *Spp1* genomic locus and targeting strategy. Boxes represent exons; exon 2 (gray) indicates the mutation site with deletion of the 45 nucleotides after the translational start site (ATG) that encode an N-terminal signal sequence while sparing other endogenous elements. A transcriptional STOP element flanked by *loxP* sites (black triangles) was inserted upstream of this mutation site to prevent OPN-i expression. Germline transmitted *Spp1*<sup>flstop/+</sup> mice were backcrossed to B6 mice for at least 5 generations before crossing with mice carrying the Cre recombinase to allow OPN-i expression. neo<sup>r</sup>, neomycin-resistance gene. **b**, PCR of genomic DNA showing wild-type, OPN-i-KI and OPN-KO mice after crossing with E1a-Cre mice using genotyping primers indicated as gray triangles in **a**. OPN-KO mice gained the STOP element (194 bp) compared to wild-type allele. wild-type: 324 bp, OPN-i-KI (after Cre recombination): 453 bp, OPN-KO: 518 bp. **c**, Secreted OPN protein measured by ELISA from supernatants of purified DC, NK, T cells and peritoneal macrophages from each mouse strain after stimulation with the indicated reagents for 24 h or 2 d for macrophages. **d**, Immunoblot analysis of splenocyte lysates from the indicated mouse strains, probed with anti-OPN and anti-actin. Right, quantification of ratio of OPN to actin ( $n = 5$  mice per group). **e**, Secreted IFN- $\alpha$  protein in pDC after stimulation by CpG-B (ODN-1668) ( $n = 3$  mice per group) (\*\*\*)  $P < 0.001$ ; error bars, mean  $\pm$  s.e.m).

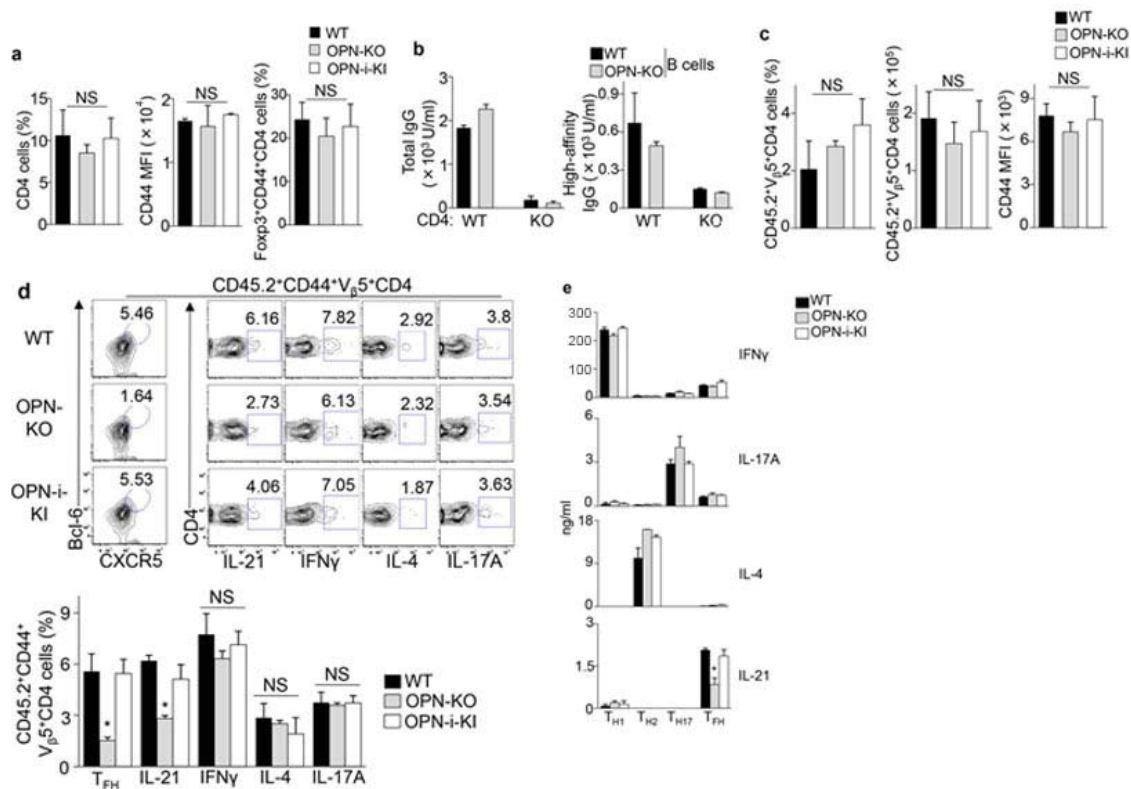

Supplementary Figure 3

### OPN-i deficiency does not affect B cell activity or other helper T cell differentiation.

**a**, Quantification of CD44 expression (MFI) by CD4<sup>+</sup> T cells, percent CD4<sup>+</sup> T cells and Foxp3<sup>+</sup>CD44<sup>+</sup>CD4<sup>+</sup> T<sub>reg</sub> cells from OT-II, OT-II OPN-KO and OT-II OPN-i-KI mice (as in **Fig. 1b**) 7 d post-challenge. Data represent at least three independent experiments with 6 mice per group (error bars, mean and  $\pm$  s.e.m). **b**, Titer of total (NP<sub>23</sub>) and high-affinity (NP<sub>4</sub>) NP-specific IgG in the serum of *Rag2<sup>-/-</sup>Prf1<sup>-/-</sup>* hosts transferred with OT-II CD4<sup>+</sup> T cells from OPN wild-type or OPN-KO mice and OPN wild-type or OPN-KO B cells followed by immunization with NP<sub>13</sub>-OVA in CFA and analysis 10 d later. Data represent two independent experiments with 4 mice per group. **c**, Frequency and numbers of donor CD45.2<sup>+</sup>V $\beta$ 5<sup>+</sup>CD4<sup>+</sup> T cells and surface expression of CD44 by these cells from spleens of CD45.1 congenic recipients 7 d post-immunization with OVA in CFA. **d**, Flow cytometry of donor V $\beta$ 5<sup>+</sup>CD4<sup>+</sup> T cells in **c**. Numbers adjacent to outlined areas indicate percent Bcl-6<sup>+</sup>CXCR5<sup>+</sup> T<sub>FH</sub> cells and V $\beta$ 5<sup>+</sup>CD4<sup>+</sup> T cells expressing intracellular cytokines. Below, frequency of T<sub>FH</sub> cells and cytokine-producing cells ( $n = 6$  mice per group). \* $P < 0.05$  (unpaired two-tailed Student's t-test); NS, not significant. Error bars indicate mean  $\pm$  s.e.m. **e**, Cytokine production by naïve CD44<sup>lo</sup>CD25<sup>-</sup>CD4<sup>+</sup> T cells purified from the indicated OT-II mice and differentiated for 5 d under T<sub>H1</sub>, T<sub>H2</sub>, T<sub>H17</sub> and T<sub>FH</sub> conditions. \* $P < 0.05$  (error bars, mean  $\pm$  s.e.m of triplicate wells).

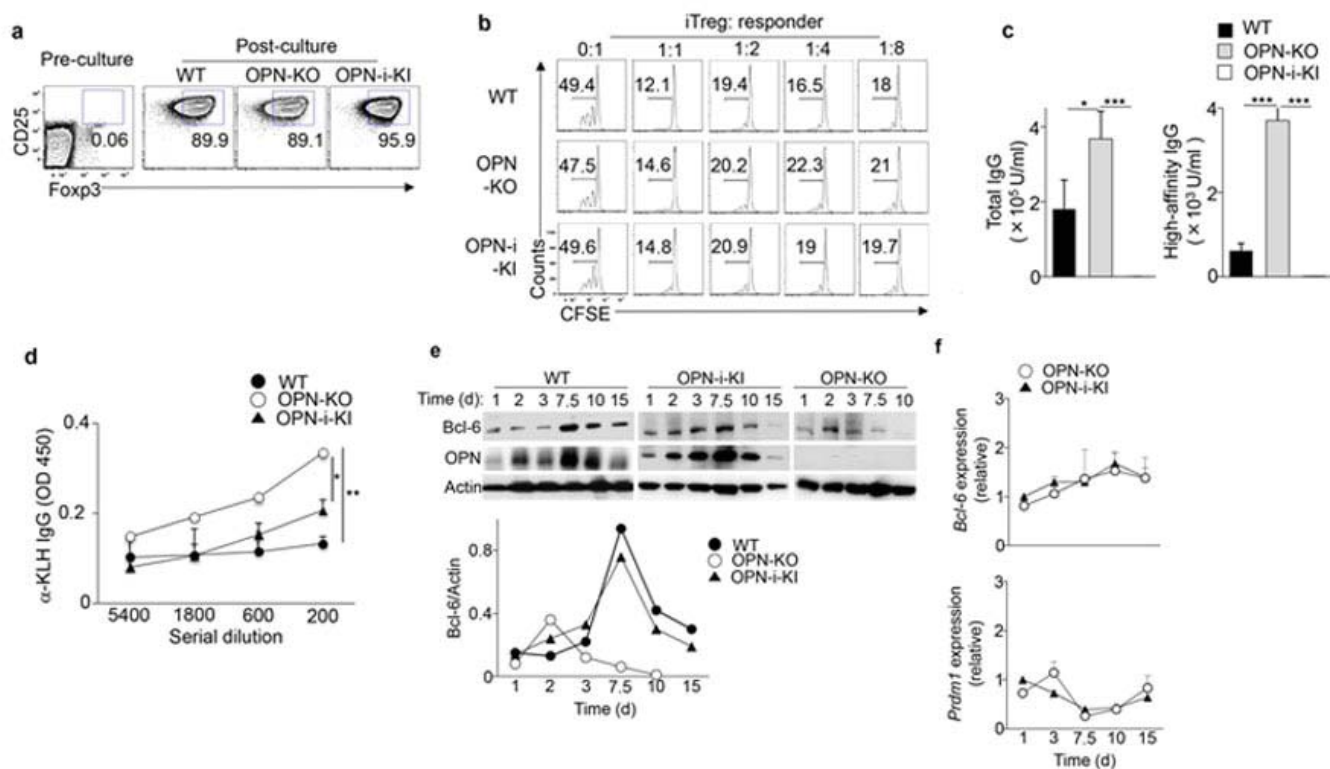

Supplementary Figure 4

### Effects of OPN-i deficiency on Bcl-6 expression and the differentiation of inducible T<sub>reg</sub> cells and T<sub>FR</sub> cells.

**a**, Flow cytometry of CD25<sup>+</sup>Foxp3<sup>+</sup> iT<sub>reg</sub> differentiated from sorted naïve CD25<sup>-</sup>CD4<sup>+</sup> T cells, stimulated with plate-bound anti-CD3 (2 µg/ml) and anti-CD28 (1 µg/ml) in the presence of TGF-β1 (5 ng/ml) and hIL-2 (100 U/ml) for 5 d. **b**, iTregs from **(a)** were co-cultured with CFSE-labeled naïve CD25<sup>-</sup>CD4<sup>+</sup> T cells (responder) activated with anti-CD3 and irradiated APC at different ratios. Histograms of CFSE dilutions, analyzed by flow cytometry, as readout of responder proliferation. Serum titers of total (NP<sub>23</sub>) and high-affinity (NP<sub>4</sub>) IgG **(c)** and anti-KLH **(d)** IgG from recipients in **Fig. 2c** ( $n = 5$  mice per group). \* $P < 0.05$ , \*\* $P < 0.01$  and \*\*\* $P < 0.001$  (unpaired two-tailed Student's t-test; error bars, mean ± s.e.m). **e**, Immunoblot analysis of enriched CD44<sup>+</sup>CD4<sup>+</sup> T cells from the indicated mice at days 1-15 after immunization with KLH in CFA, probed with the indicated Abs. Below, ratio of Bcl-6 to actin. **f**, RT-PCR analysis of *Bcl6* and *Prdm1* mRNA in CD44<sup>+</sup>CD4<sup>+</sup> T cells purified from OPN-i-KI or OPN-KO mice from **e**. *Bcl6* or *Prdm1* expression was normalized to the *Rps18* control and results are presented relative to that of OPN-i-KI mice at d1, set as 1. Data are representative of two independent experiments **(e)** or one experiment with 3 mice per time point **(f)**; error bars, mean ± s.e.m).

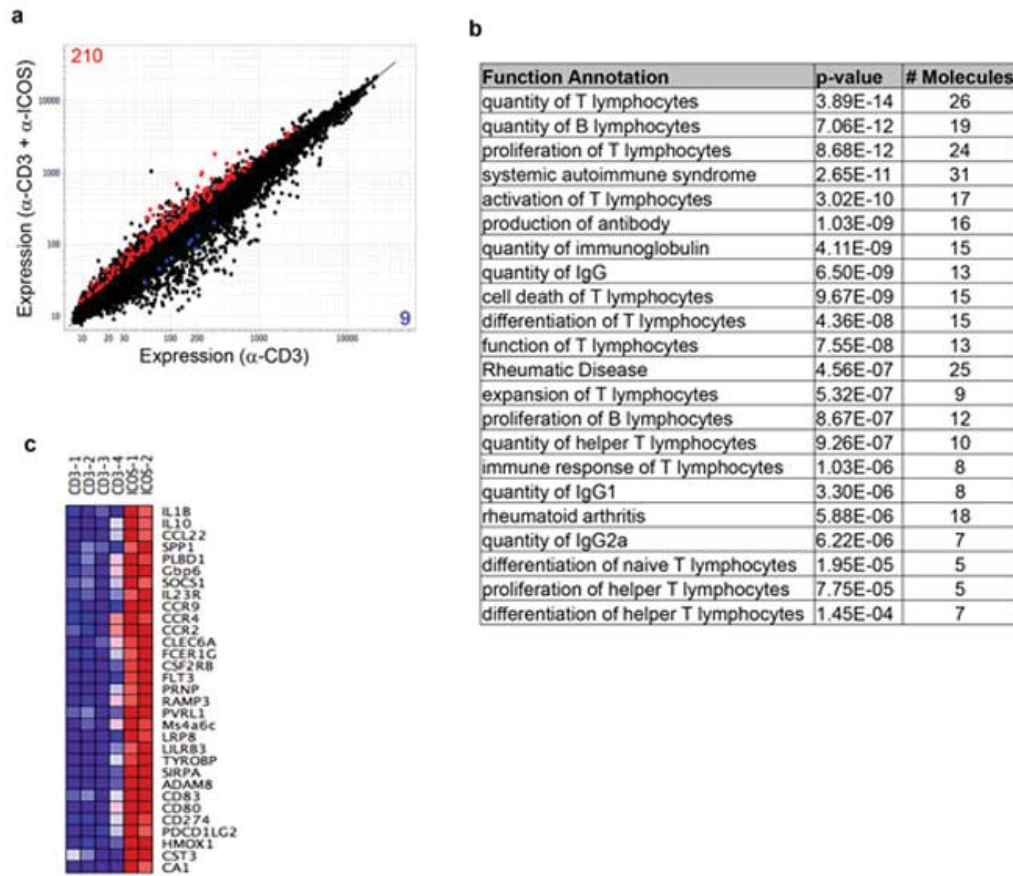

Supplementary Figure 5

### Microarray analysis of genes upregulated in CD4<sup>+</sup> T cells by costimulation with ICOS.

**a**, Multiplot of genes upregulated in CD4<sup>+</sup> T cells after restimulation with anti-CD3 and anti-ICOS (duplicates) compared to anti-CD3 alone (quadruplicates) as described in **Fig. 4a**. 210 (red) genes upregulated and 9 (blue) genes downregulated after co-ligation of CD3 and ICOS (cut-off 1.5 fold and  $P < 0.01$ ). **b**, Functional analysis performed by Ingenuity pathway analysis (IPA) of 210 genes upregulated by ICOS co-stimulation in **a**. Functional annotations that are related to T-cell activation, differentiation, antibody production and antibody-mediated autoimmune disease with  $P$  values and numbers of genes are listed. **c**, Heatmap analysis displays 31 genes upregulated in ICOS-activated CD4<sup>+</sup> T cells that correlate with systemic autoimmune syndrome revealed by IPA in **b** ( $P = 2.65 \times 10^{-11}$ ).



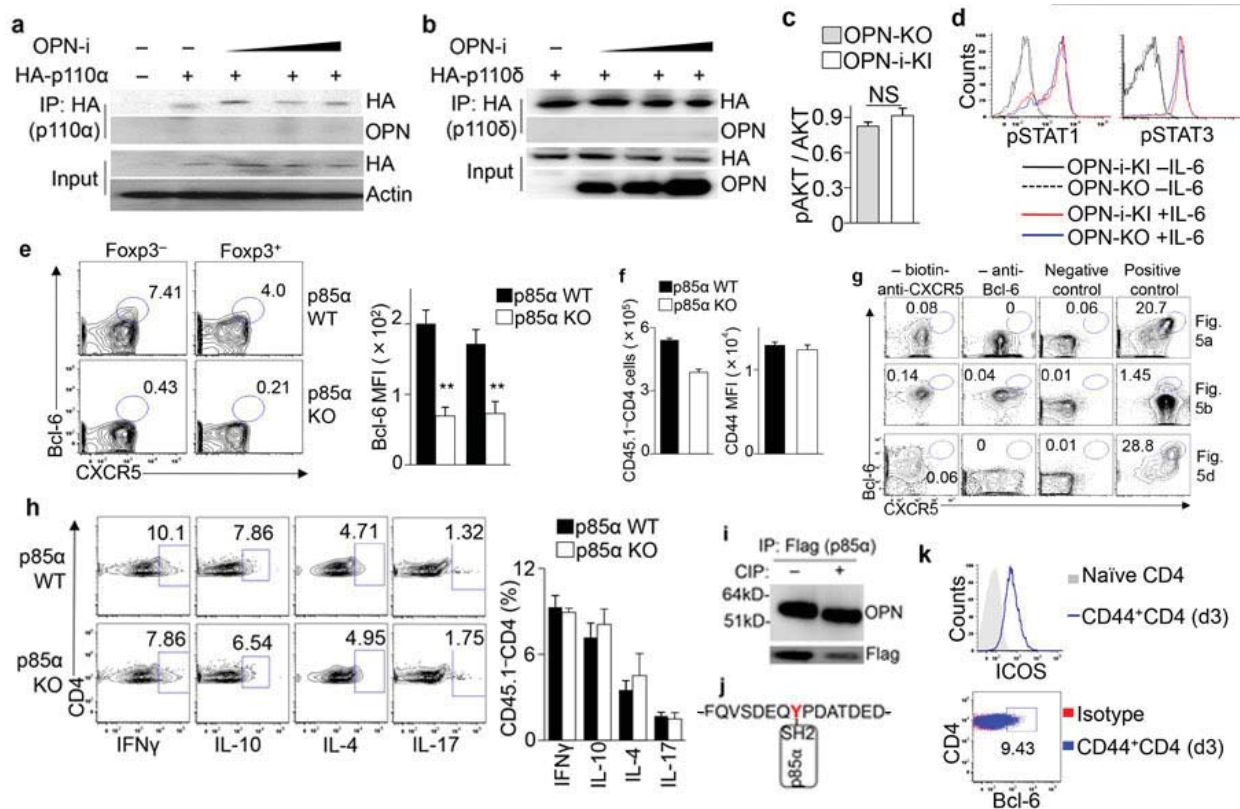

Supplementary Figure 6

### OPN-i does not interact with p110, and p85α deficiency does not impair other helper T cell differentiation *in vivo*.

Immunoassay of lysates of 293T cells transfected with plasmids expressing HA-p110α (**a**) or HA-p110δ (**b**) and increasing concentrations of OPN-i, assessed by immunoprecipitation with anti-HA and immunoblot analysis with the indicated Abs. **c**, Purified CD44<sup>+</sup>CD4<sup>+</sup> T cells from OPN-i-KI or OPN-KO mice 3 d after immunization with KLH and CFA were treated as in **Fig. 4a**. Quantification of ratios of phospho-Akt (pAkt) to total Akt by ELISA from cells after 30 min of crosslinking. **d**, Flow cytometry of splenocytes of OT-II OPN-i-KI or OT-II OPN-KO mice 3 d post-immunization with NP<sub>13</sub>-OVA in CFA, stimulated with (+) or without (-) IL-6 (20 ng/ml) for 15 min. Overlay of histograms of intracellular phospho-STAT1 and phospho-STAT3 among CD4<sup>+</sup>CD44<sup>+</sup> T cells. **e**, Flow cytometry of splenocytes from p85α wild-type and p85α KO mice 3 d after injection with KLH and CFA. Numbers indicate percent Foxp3<sup>-</sup>Bcl-6<sup>+</sup>CXCR5<sup>+</sup> T<sub>FH</sub> cells and Foxp3<sup>+</sup>Bcl-6<sup>+</sup>CXCR5<sup>+</sup> T<sub>FR</sub> cells. Right, Bcl-6 MFI (*n* = 4 mice per group). \*\**P* < 0.01 (unpaired two-tailed Student's *t*-test; error bars, mean ± s.e.m). Data represent two independent experiments. **f**, Quantification of numbers and surface CD44 expression of CD45.1<sup>+</sup>CD4<sup>+</sup> donor cells from **Fig. 5a**. **g**, Gating controls for defining Bcl-6<sup>+</sup>CXCR5<sup>+</sup> CD4<sup>+</sup> T<sub>FH</sub> or T<sub>FR</sub> cells in **Fig. 5a,b,d**. CXCR5 control: all antibodies except (-) biotin-anti-CXCR5 (streptavidin-APC alone); Bcl-6 control: all antibodies except anti-Bcl-6; in this case, an IgG isotype-matched control for anti-Bcl-6 was used; Negative control: splenic CD44<sup>lo</sup>CD4<sup>+</sup> T cells from B6 mice at day 8 post-injection with KLH in CFA; Positive control: splenic CD44<sup>hi</sup>CD25<sup>med</sup>CD4<sup>+</sup> T cells from B6 mice at d8 post-immunization with KLH in CFA; or Bcl-6<sup>+</sup>CXCR5<sup>+</sup> cells in CD19<sup>+</sup> B cells from *Tcrα*<sup>-/-</sup> recipients of p85α KO T<sub>reg</sub> in **Fig. 5b**. **h**, Flow cytometry of donor CD45.1<sup>+</sup>CD4<sup>+</sup> T cells from **Fig. 5a**, stimulated with PMA and Ionomycin for 5 h. Numbers indicate percent CD4<sup>+</sup> T cells expressing intracellular cytokines. Right, frequency of cytokine-producing CD4<sup>+</sup> T cells. Data represent two independent experiments with 3-4 mice per group (error bars, mean ± s.e.m). **i**, Immunoassay of lysates of 293T cells transfected with vectors expressing Flag-p85α and OPN-i, treated with calf intestinal phosphatase

(CIP), and assessed by immunoprecipitation with anti-Flag followed by immunoblot analysis. **j**, Diagram of a short sequence motif of OPN with a tyrosine at position 166 that may interact with the p85 $\alpha$  SH2 domain. **k**, Expression of surface ICOS receptor and intracellular Bcl-6 in CD44<sup>+</sup>CD4<sup>+</sup> T cells from OPN-i-KI mice 3 d after immunization with KLH in CFA.

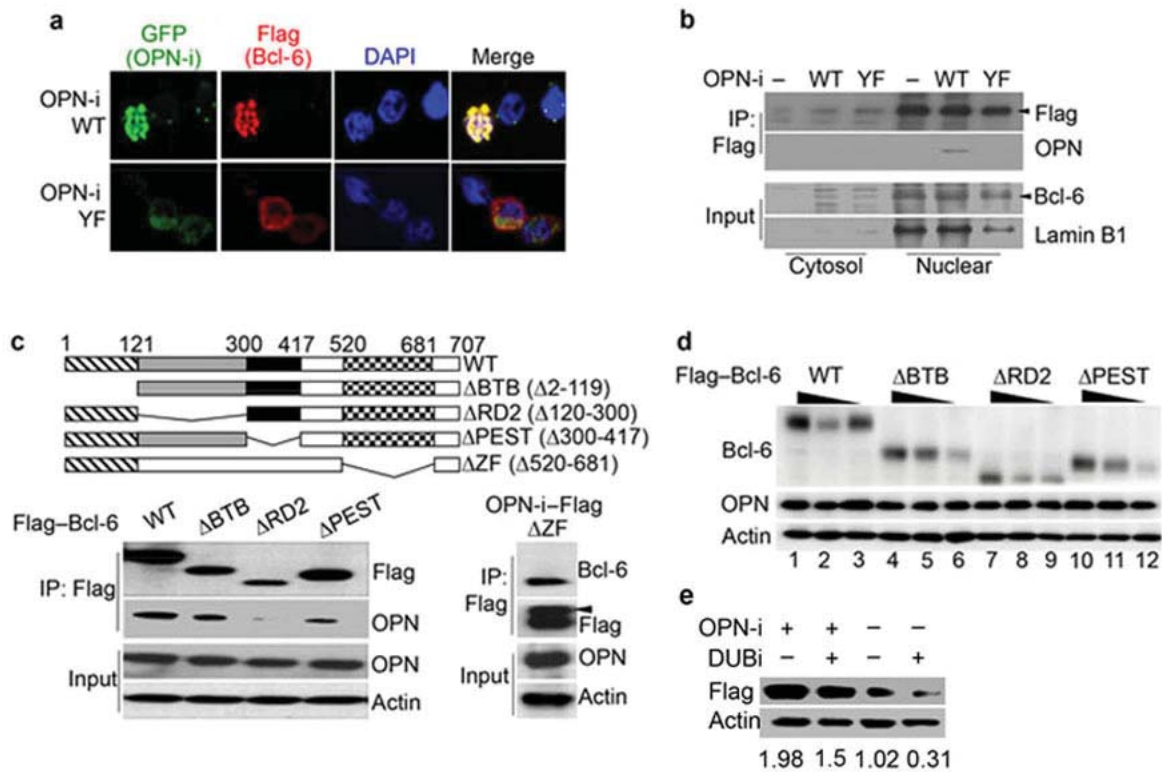

Supplementary Figure 7

**Wild-type OPN-i interacts with and stabilizes Bcl-6, but the Y166F OPN-i mutant does not.**

**a**, Confocal microscopy of 293T cells transfected with plasmids encoding p85 $\alpha$ , Flag-Bcl-6 and OPN-i-GFP wild-type or OPN-i-GFP Y166F mutant, assessed by pre-extraction of soluble nuclear proteins with 0.5% Triton X-100 after 24 h of transfection followed by immunostaining as indicated. Yellow in the merged image shows colocalization of Bcl-6 and OPN-i wild-type. **b**, Immunoassay of nuclear and cytosolic fractions of 293T cells transfected with plasmids encoding Flag-Bcl-6, OPN-i wild-type or OPN-i Y166F mutant, assessed by immunoprecipitation (IP) with anti-Flag and then immunoblot analysis. **c**, Top, Illustration of Bcl-6 protein deletion mutants. Immunoassay of lysates of 293T cells transfected with plasmids encoding OPN-i and Flag-Bcl-6 wild-type or deletion mutants, assessed by IP and immunoblot analysis as in **b**. Right, immunoassay of lysates of 293T cells transfected with plasmids encoding OPN-i-Flag and Bcl-6 ZF deletion mutant (no Flag tag) followed by IP with anti-Flag and immunoblot with anti-Bcl-6 and anti-Flag. Arrowhead: IgG heavy chain. **d**, Immunoblot analysis of lysates of 293T cells transfected with plasmids encoding OPN-i (100 ng) and graded concentrations of Flag-Bcl-6 wild-type or deletion mutants (lane 1,4,7,10: 450 ng; 2,5,8,11: 300 ng; 3,6,9,12: 150 ng). Cell lysates from lanes 1,4,7,10 were used for immunoassay in **Fig. 7b**. **e**, Immunoblot analysis of lysates of 293T cells transfected with plasmids encoding Flag-Bcl-6 and/or OPN-i, treated with (+) or without (-) DUBi for 8 h, probed with anti-Flag and anti-actin. Below lanes, ratio of Flag (Bcl-6) to actin.



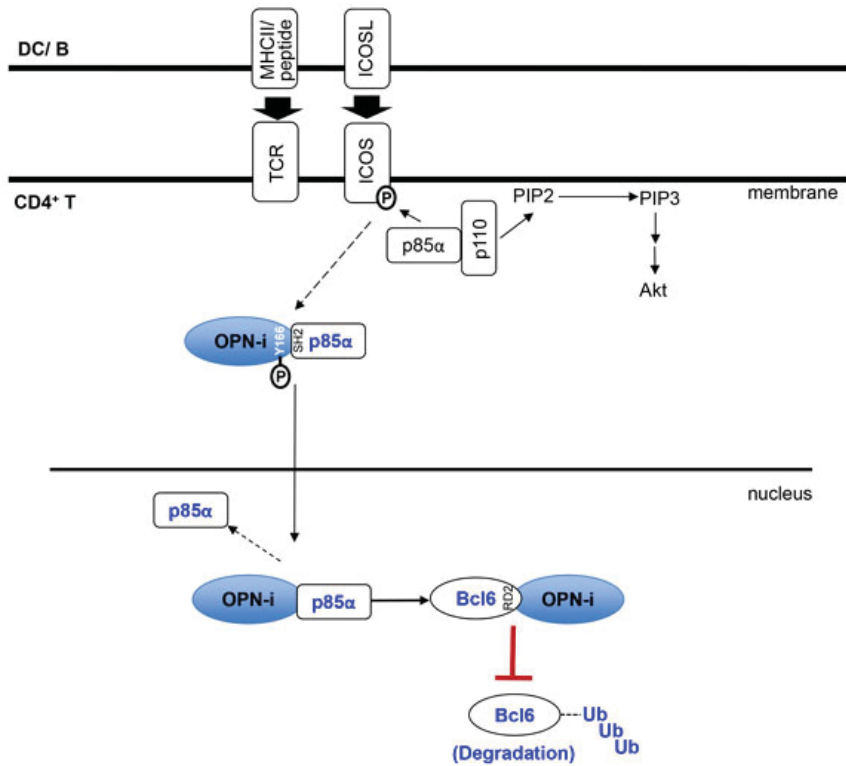

**Stable Bcl6 expression**  
**Functional T<sub>FH</sub> and T<sub>FR</sub> differentiation**

Supplementary Figure 8

**Schematic of sustenance of Bcl-6-dependent follicular T cell differentiation mediated by the p85α-OPN-i axis.**

Engagement of ICOS and TCR on CD4<sup>+</sup> T cells by APC (e.g., DC) promotes p85α-OPN-i complex formation that requires the tyrosine site 166 of OPN-i. p85α chaperones OPN-i entry into the nucleus, where intranuclear OPN-i interacts with Bcl-6 via the sequences within the RD2 and protects Bcl-6 from ubiquitination-mediated degradation. This p85α-OPN-i axis connects ICOS signals to stable Bcl-6 expression (highlighted in blue) and ensures functional follicular T cell differentiation program.
